# Supplementary material
Source: Springer Nature journal article supplement (https://www.springermedizin.de/resource/supplementary/12245_2012_108_MOESM2_ESM.pdf/9672790)

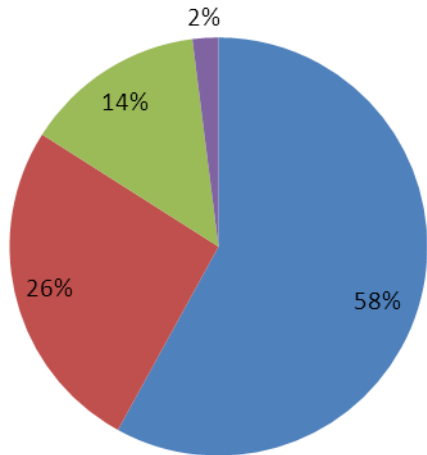

- Car Crash n=29
- Pedestrian Injury n=13
- Motorcycle Crash n=7
- Bicycle Crash n=1

Supplement: MOESM2 [file 9672790]
